# Supplementary material for: Synthesis of nickel hierarchical structures and evaluation on their magnetic properties and Congo red removal ability
Source: Royal Society of Chemistry journal article supplement (doi:10.1039/c2dt32268d), 2012-12-07
Supplement: c2dt32268d.pdf [file c2dt32268d.pdf]

# **Synthesis of Nickel Hierarchical Structures and Evaluation on Their Magnetic Properties and Congo Red Removal Ability**

**Guangshu Zhang and Lijun Zhao\***

Key Laboratory of Automobile Materials (Jilin University), Ministry of Education and  
School of Materials Science and Engineering, Jilin University, Changchun 130022,  
China

Fax: +86-0431-85095876

E-mail: [lijunzhao@jlu.edu.cn](mailto:lijunzhao@jlu.edu.cn)

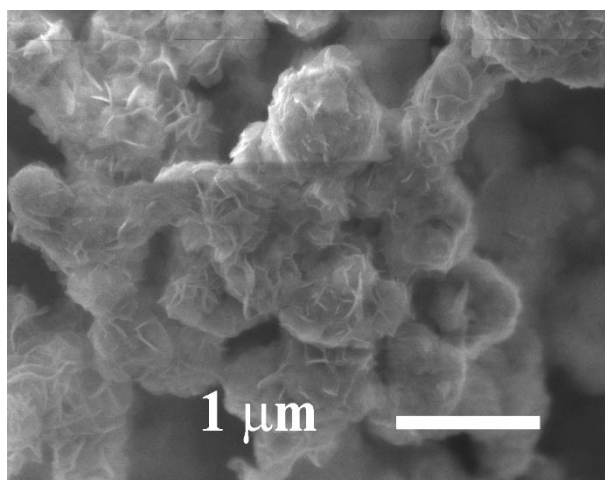

Fig. S1. The SEM image of S6 was obtained when the reaction time was 6 h

It can be found that not all of the nickel particles are covered by the nanoflakes. So we can conclude that the nanoflakes are not grown from the center but from the external surface.

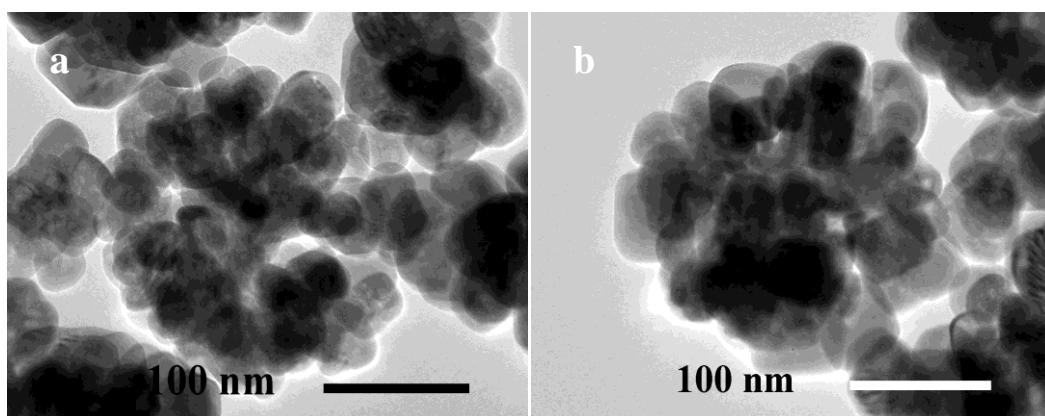

Fig. S2. TEM figures: (a) S1 and (b) S2

The morphologies of S1 and S2 were composed of 10 nm and 30 nm of nanoparticles, respectively.

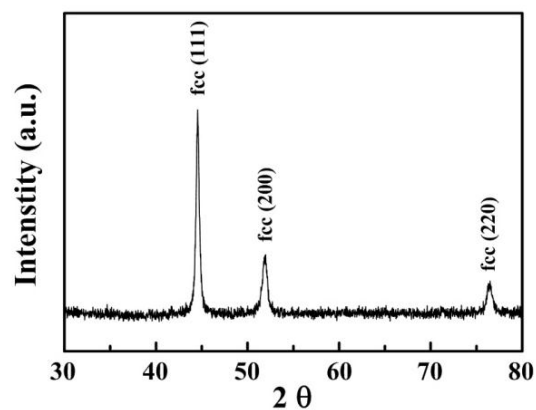

**Fig. S3** XRD pattern of the S7 collected by solvothermal treatment for 12 h at 220 °C

**Table S1**

| Sample                                  | S1 | S2 | S3 | S4 | S5 | S6 | S7 |
|-----------------------------------------|----|----|----|----|----|----|----|
| BET surface area<br>(m <sup>2</sup> /g) | 68 | 63 | 59 | 52 | 57 | 42 | 35 |
